# Supplementary material for: Metabolomic profiles delineate the potential role of glycine in gold nanorod-induced disruption of mitochondria and blood–testis barrier factors in TM-4 cells
Source: Royal Society of Chemistry journal article supplement (doi:10.1039/c4nr01035c), 2014-01-01
Supplement: c4nr01035c1.pdf [file c4nr01035c1.pdf]

Table S1. Sequences of primers for RT-PCR.

| <i>gene</i>              |                | Sequences                     |
|--------------------------|----------------|-------------------------------|
| <i>mmu</i> - SHMT2       | Forward Primer | 5'- TGGCAAGAGATACTACGGAGG-3'  |
|                          | Reverse Primer | 5'-AGATCCGCTTGACATCAGACA-3'   |
| <i>mmu</i> - MTHFD1L     | Forward Primer | 5'-GCATGGCCTTACCCTTCAGAT-3'   |
|                          | Reverse Primer | 5'-GTACGAGCTTCCCCAGATTGA-3'   |
| <i>mmu</i> - SHMT1       | Forward Primer | 5'- CAGGGCTCTGTCTGATGCAC-3'   |
|                          | Reverse Primer | 5'-CGTAACGCGCTCTTGTCAC-3'     |
| <i>mmu</i> - MTHFD1      | Forward Primer | 5'-GGGAATCCTGAACGGGAAACT-3'   |
|                          | Reverse Primer | 5'-TGAGTGGCTTTGATCCCAATC-3'   |
| <i>mmu</i> - Claudin-5   | Forward Primer | 5'- GCAAGGTGTATGAATCTGTGCT-3' |
|                          | Reverse Primer | 5'- GTCAAGGTAACAAAGAGTGCCA-3' |
| <i>mmu</i> - Occludin    | Forward Primer | 5'- CCACCCCATCTGACTATGC-3'    |
|                          | Reverse Primer | 5'- TCGCTTGCCATTCACTTTGC-3'   |
| <i>mmu</i> - ZO-1        | Forward Primer | 5'- CCTGACGGTTGGTCTTTTGC-3'   |
|                          | Reverse Primer | 5'-ACAGTTGGCTCCAACAAGGT-3'    |
| <i>mmu</i> - Connexin-43 | Forward Primer | 5'- ATCGTGGATCAGCGACCTTC-3'   |
|                          | Reverse Primer | 5'- GTTGAGTACCACCTCCACGG-3'   |
| <i>mmu</i> -GAPDH        | Forward Primer | 5'-AGGTCGGTGTGAACGGATTTG-3'   |
|                          | Reverse Primer | 5'-GGGGTCGTTGATGGCAACA-3'     |

**A**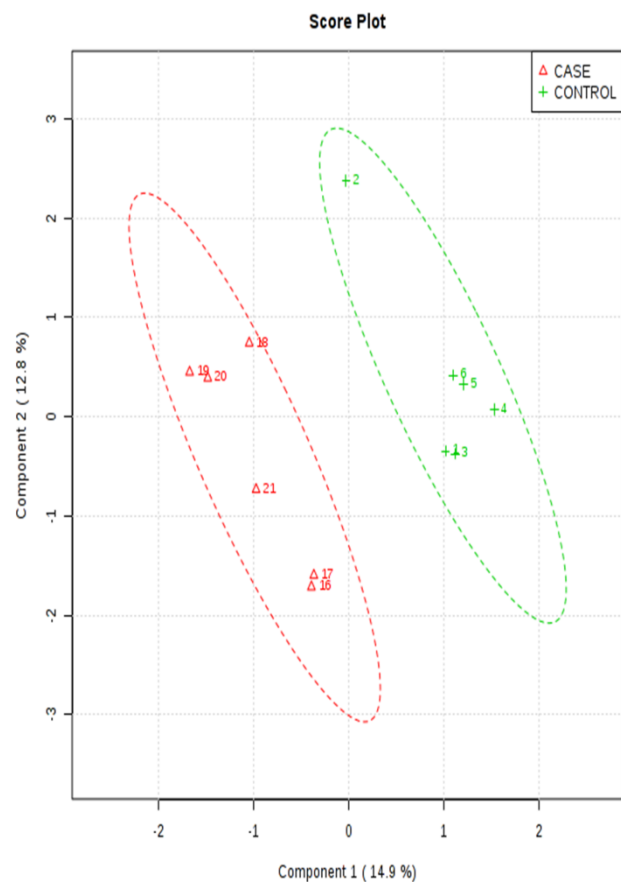**B**

| Metabolic pathways                          | Total Cmpd Hits | Raw p | FDR      | Impact  |         |
|---------------------------------------------|-----------------|-------|----------|---------|---------|
| Steroid hormone biosynthesis                | 72              | 2     | 0.03417  | 0.88754 | 0.06863 |
| Tyrosine metabolism                         | 44              | 3     | 0.058293 | 0.88754 | 0.21024 |
| Primary bile acid biosynthesis              | 46              | 2     | 0.12156  | 0.88754 | 0.05952 |
| Cyanoamino acid metabolism                  | 6               | 1     | 0.19374  | 0.88754 | 0       |
| Methane metabolism                          | 9               | 1     | 0.19374  | 0.88754 | 0       |
| Porphyrin and chlorophyll metabolism        | 27              | 1     | 0.19374  | 0.88754 | 0       |
| beta-Alanine metabolism                     | 17              | 4     | 0.1989   | 0.88754 | 0.44444 |
| Biotin metabolism                           | 5               | 1     | 0.23118  | 0.88754 | 0       |
| Lysine degradation                          | 23              | 2     | 0.24974  | 0.88754 | 0.08824 |
| Lysine biosynthesis                         | 4               | 2     | 0.24974  | 0.88754 | 0       |
| Propanoate metabolism                       | 20              | 2     | 0.25307  | 0.88754 | 0       |
| Tryptophan metabolism                       | 40              | 2     | 0.2601   | 0.88754 | 0.00068 |
| Nitrogen metabolism                         | 9               | 3     | 0.29901  | 0.88754 | 0       |
| Pantothenate and CoA biosynthesis           | 15              | 5     | 0.30306  | 0.88754 | 0.02041 |
| Glycine, serine and threonine metabolism    | 31              | 6     | 0.34359  | 0.89053 | 0.38693 |
| Arachidonic acid metabolism                 | 36              | 1     | 0.34752  | 0.89053 | 0.02076 |
| Nicotinate and nicotinamide metabolism      | 13              | 2     | 0.3716   | 0.8962  | 0.2381  |
| Arginine and proline metabolism             | 44              | 8     | 0.42354  | 0.94777 | 0.2727  |
| Pyrimidine metabolism                       | 41              | 11    | 0.45937  | 0.94777 | 0.36444 |
| Alanine, aspartate and glutamate metabolism | 24              | 3     | 0.48513  | 0.94777 | 0.26687 |
| Glutathione metabolism                      | 26              | 5     | 0.48544  | 0.94777 | 0.38169 |
| Purine metabolism                           | 68              | 6     | 0.57339  | 0.96566 | 0.06357 |
| Taurine and hypotaurine metabolism          | 8               | 2     | 0.58446  | 0.96566 | 0.42857 |
| Pentose phosphate pathway                   | 19              | 1     | 0.60015  | 0.96566 | 0.01952 |
| Fatty acid biosynthesis                     | 43              | 1     | 0.648    | 0.96566 | 0       |
| Valine, leucine and isoleucine degradation  | 38              | 3     | 0.64942  | 0.96566 | 0       |
| Steroid biosynthesis                        | 35              | 1     | 0.66957  | 0.96566 | 0.00207 |
| Cysteine and methionine metabolism          | 27              | 4     | 0.71156  | 0.96566 | 0.3088  |
| D-Glutamine and D-glutamate metabolism      | 5               | 1     | 0.73558  | 0.96566 | 0       |
| Sphingolipid metabolism                     | 21              | 1     | 0.73975  | 0.96566 | 0.01504 |
| Aminoacyl-tRNA biosynthesis                 | 69              | 8     | 0.76613  | 0.96566 | 0       |
| Citrate cycle (TCA cycle)                   | 20              | 3     | 0.78579  | 0.96566 | 0.12564 |
| Glycerophospholipid metabolism              | 30              | 3     | 0.80489  | 0.96566 | 0.06667 |
| Butanoate metabolism                        | 22              | 1     | 0.81367  | 0.96566 | 0.02899 |
| Valine, leucine and isoleucine biosynthesis | 11              | 2     | 0.82434  | 0.96566 | 0.66666 |
| Pyruvate metabolism                         | 23              | 1     | 0.91019  | 0.97615 | 0       |
| Phenylalanine metabolism                    | 11              | 1     | 0.9143   | 0.97615 | 0.22222 |
| Thiamine metabolism                         | 7               | 1     | 0.91602  | 0.97615 | 0       |
| Glyoxylate and dicarboxylate metabolism     | 18              | 3     | 0.92853  | 0.97615 | 0.32258 |
| Histidine metabolism                        | 15              | 1     | 0.9697   | 0.97995 | 0.24194 |
| Glycerolipid metabolism                     | 18              | 3     | 0.97995  | 0.97995 | 0.13031 |

**Figure S1.** Metabolite profiling analysis in GC-2 cells. (A) PCA plot for GC/MS data. (B) Metabolites pathways changes detected using GC/MS.

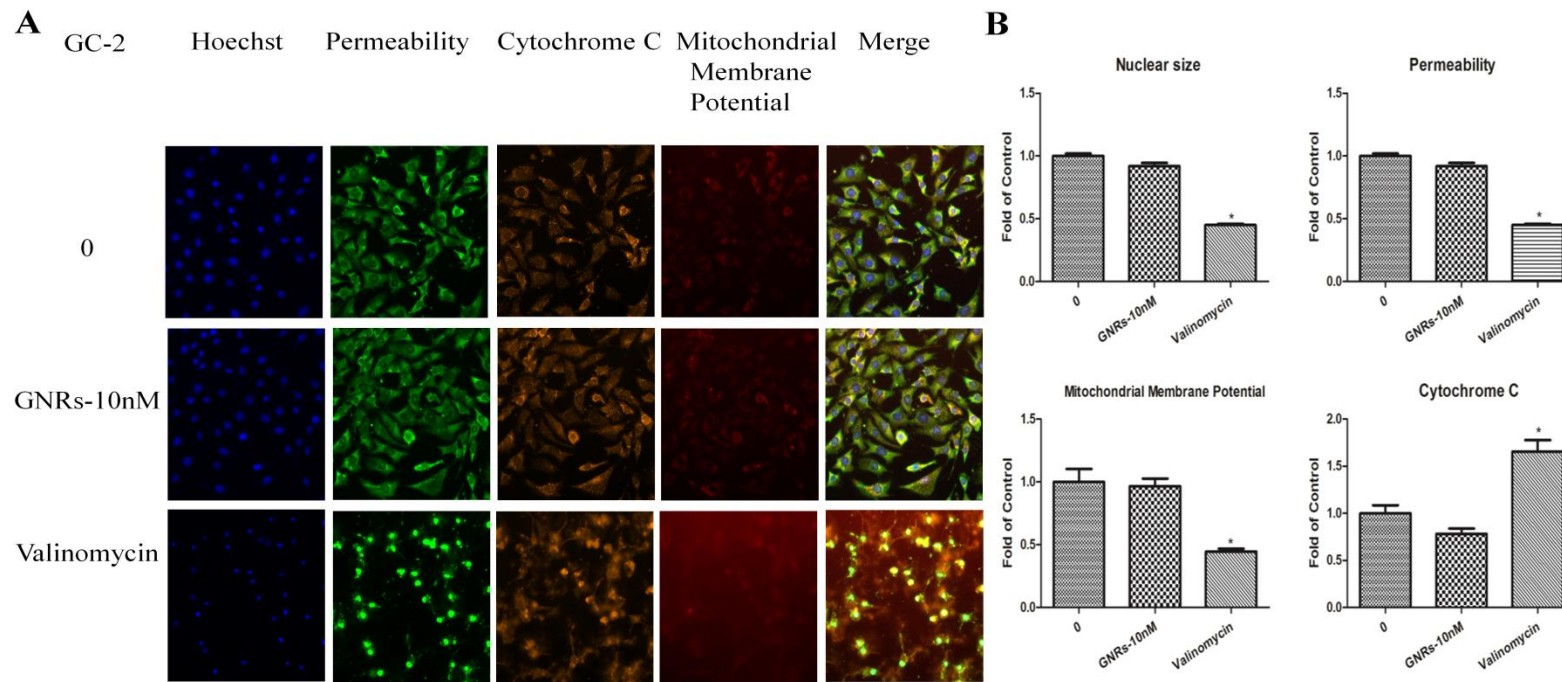

**Figure S2.** Representative images from the HCS after GNRs exposure to GC-2 cells. (A) Staining for nuclei (blue), cell membrane permeability (green), cytochrome c (yellow) and mitochondria membrane potential (red). Images were acquired with the ArrayScan HCS Reader with a 20 x objective. (B) The relative expressions of nuclear size, permeability, cytochrome c and mitochondria membrane potential. \* indicates significant difference when the values were compared to that of the control ( $p < 0.05$ ).
